# Supplementary material
Source: PubMed Central journal article supplement (PMC9061819)
Supplement: 41423_2022_855_MOESM1_ESM.pdf [file 41423_2022_855_MOESM1_ESM.pdf]

**Supplementary Materials for**

**Intranasal administration of a single dose of a candidate live attenuated  
vaccine derived from an NSP16-deficient SARS-CoV-2  
confers sterilizing immunity in animals**

Zi-Wei Ye<sup>1†</sup>, Chon Phin Ong<sup>2†</sup>, Kaiming Tang<sup>1†</sup>, Yilan Fan<sup>1†</sup>, Cuiting Luo<sup>1</sup>, Runhong Zhou<sup>1</sup>, Peng Luo<sup>1</sup>, Yun Cheng<sup>2</sup>, Victor Sebastien Gray<sup>2</sup>, Pui Wang<sup>1,3</sup>, Hin Chu<sup>1,3</sup>, Jasper Fuk-Woo Chan<sup>1,3</sup>, Kelvin Kai-Wang To<sup>1,3</sup>, Honglin Chen<sup>1,3</sup>, Zhiwei Chen<sup>1,3</sup>, Kwok-Yung Yuen<sup>1,3</sup>, Guang Sheng Ling<sup>2\*</sup>, Shuofeng Yuan<sup>1,3\*</sup>, Dong-Yan Jin<sup>2\*</sup>

The PDF file includes:

Figs. S1 to S7

Table S1

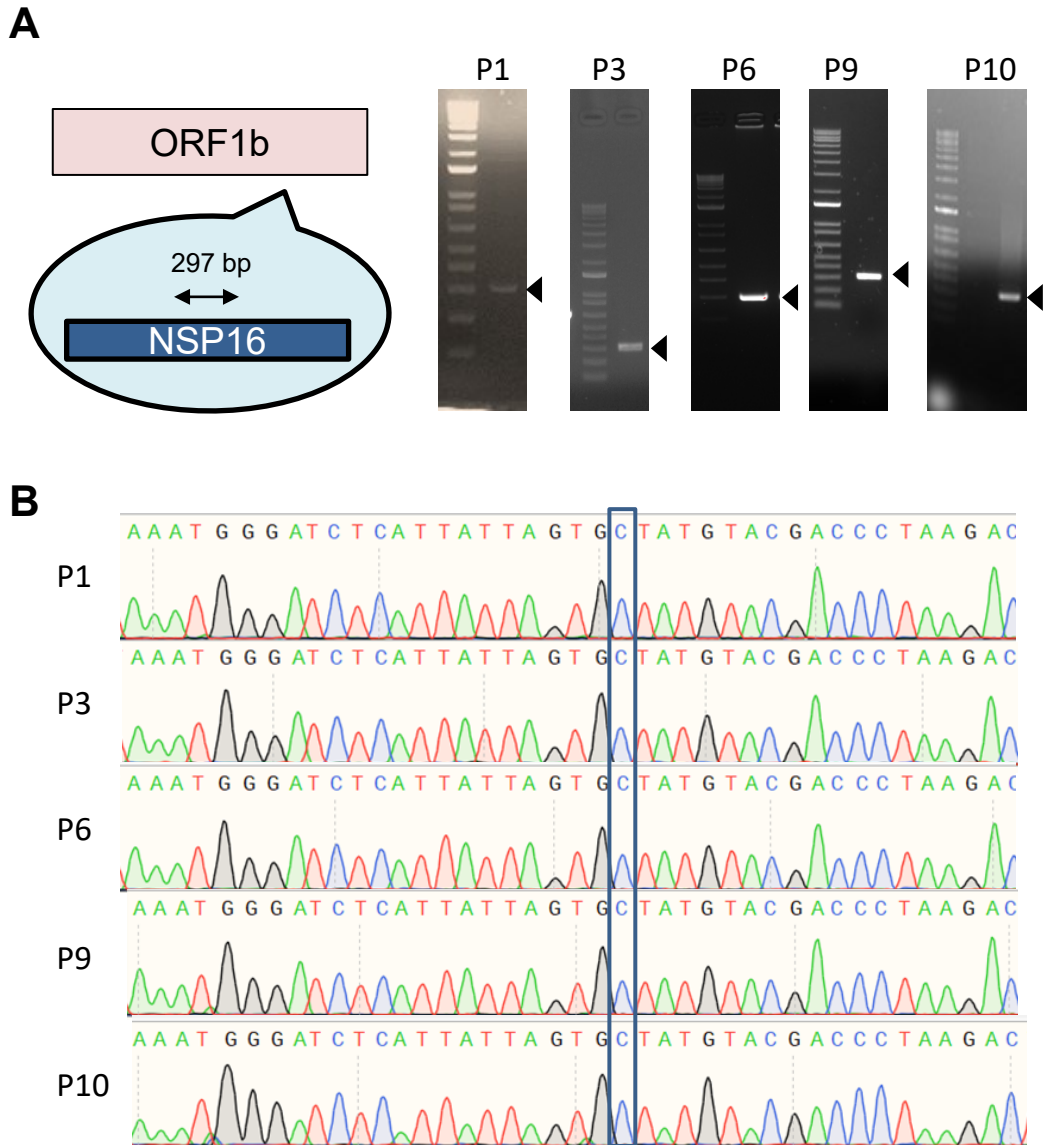

**Fig. S1. Genetic stability of SARS-CoV-2 d16.** **A** Detection of d16 gene during viral passage in VeroE6 cells. RNAs were extracted from the d16-infected cells of P0 to P10 passages. RT-PCR was performed with a primer pair flanking the d16 mutation. The 297-bp PCR products were resolved by agarose gel electrophoresis (arrowhead). The passage numbers were denoted at the top of each lane. **B** Sanger sequencing.

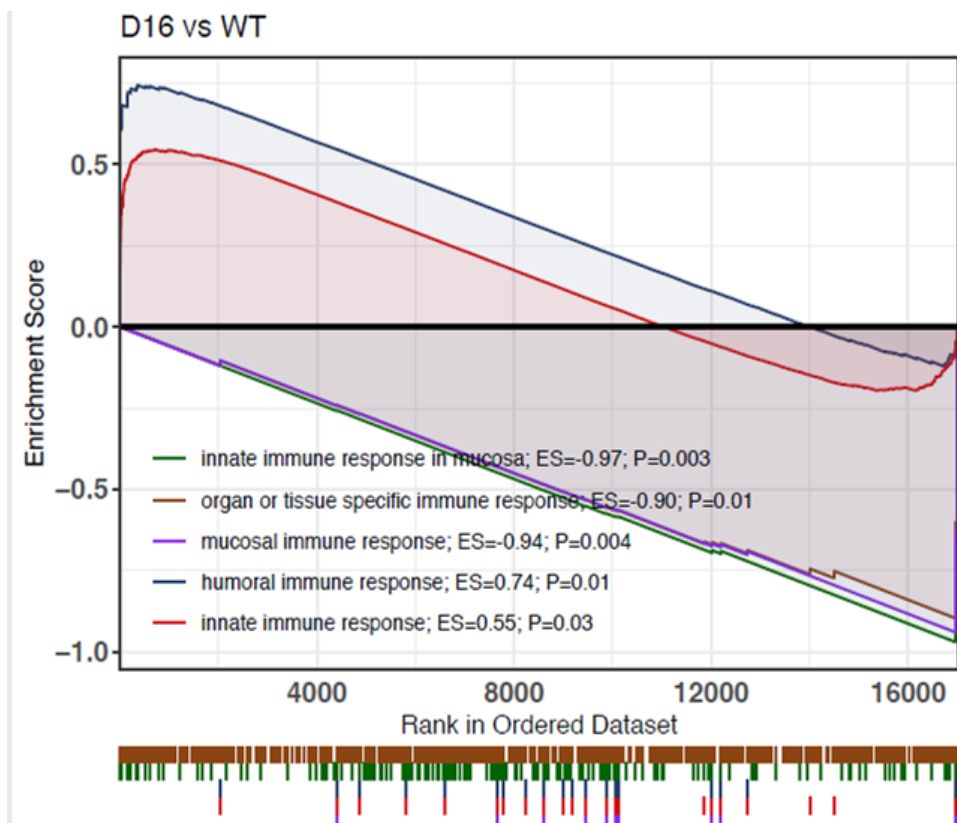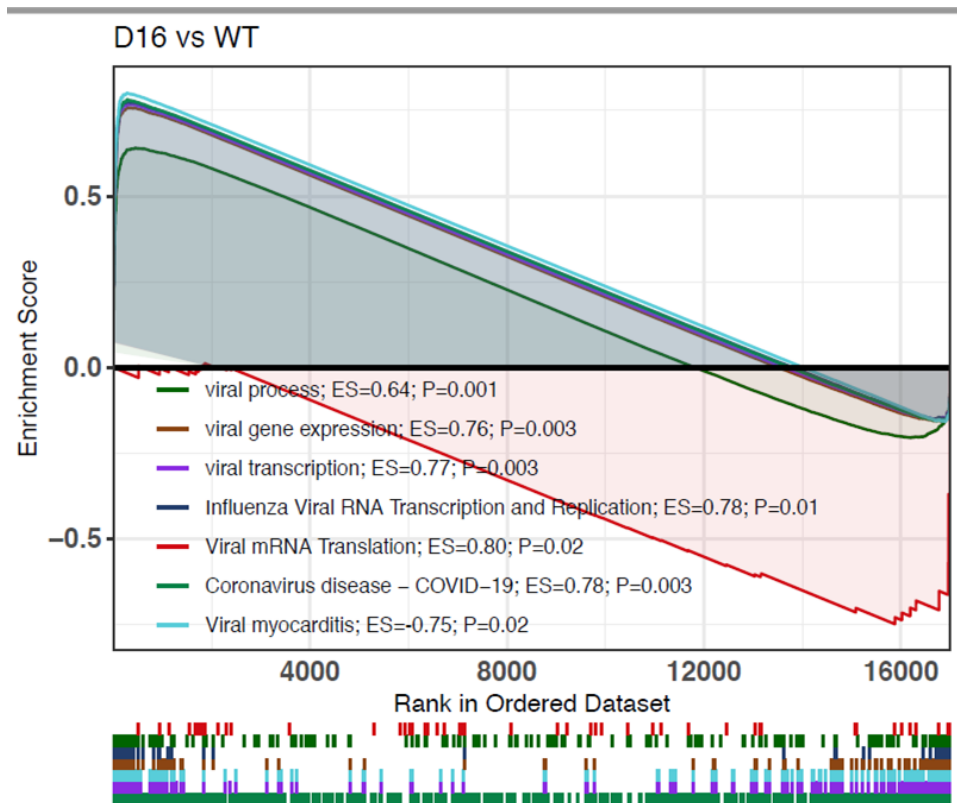

**Fig. S2. Gene set enrichment analysis (GSEA) comparing SARS-CoV-2 d16 mutant to WT.** Virus infection was performed on A549-ACE2-TMPRSS2 cells, followed by RNA-seq and GSEA analysis. GSEA enrichment plots of two target classes are shown, including mucosal immune response and viral transcription ( $P < 0.05$ ).

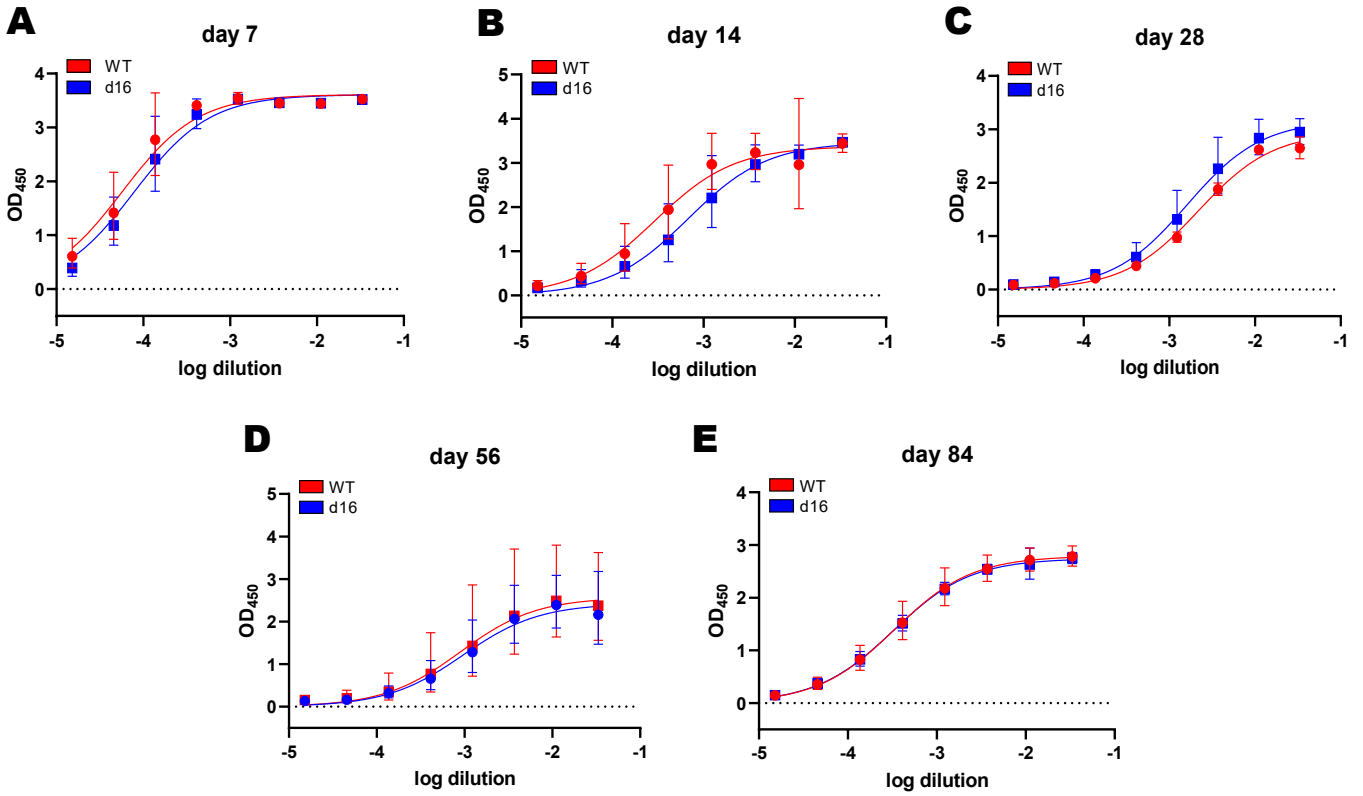

**Fig. S3. Antibody response in hamsters infected with SARS-CoV-2 WT and d16 on day 7, 14, 28, 56 and 84, respectively. Serum IgG levels were measured using ELISA for anti-SARS-CoV-2 RBD. Data points presented in geomean  $\pm$  SEM (n = 5).**

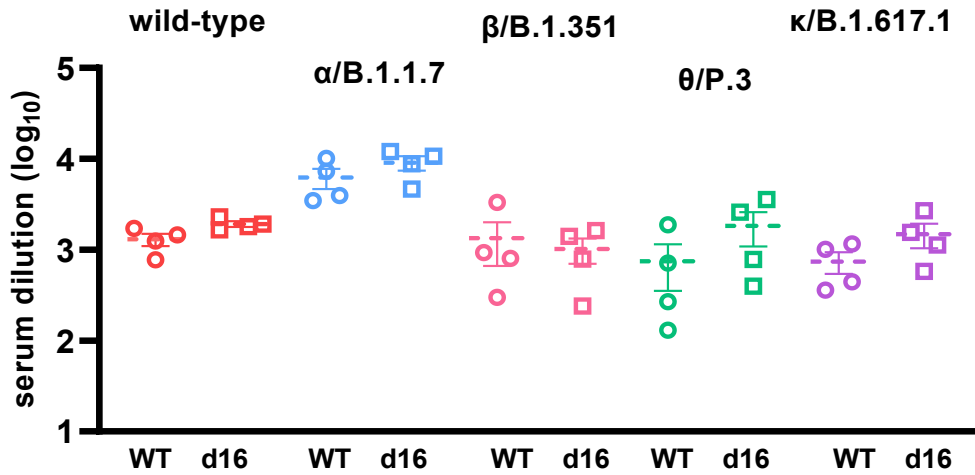

**Fig. S4. Antibody response in hamsters infected with SARS-CoV-2 WT and d16 on day 28 against different SARS-CoV-2 variants of concern.** Serially diluted hamster sera were tested against WT and various SARS-CoV-2 variants ( $\alpha$ ,  $\beta$ ,  $\theta$ , and  $\kappa$ ) to evaluate their antibodies for neutralizing abilities.

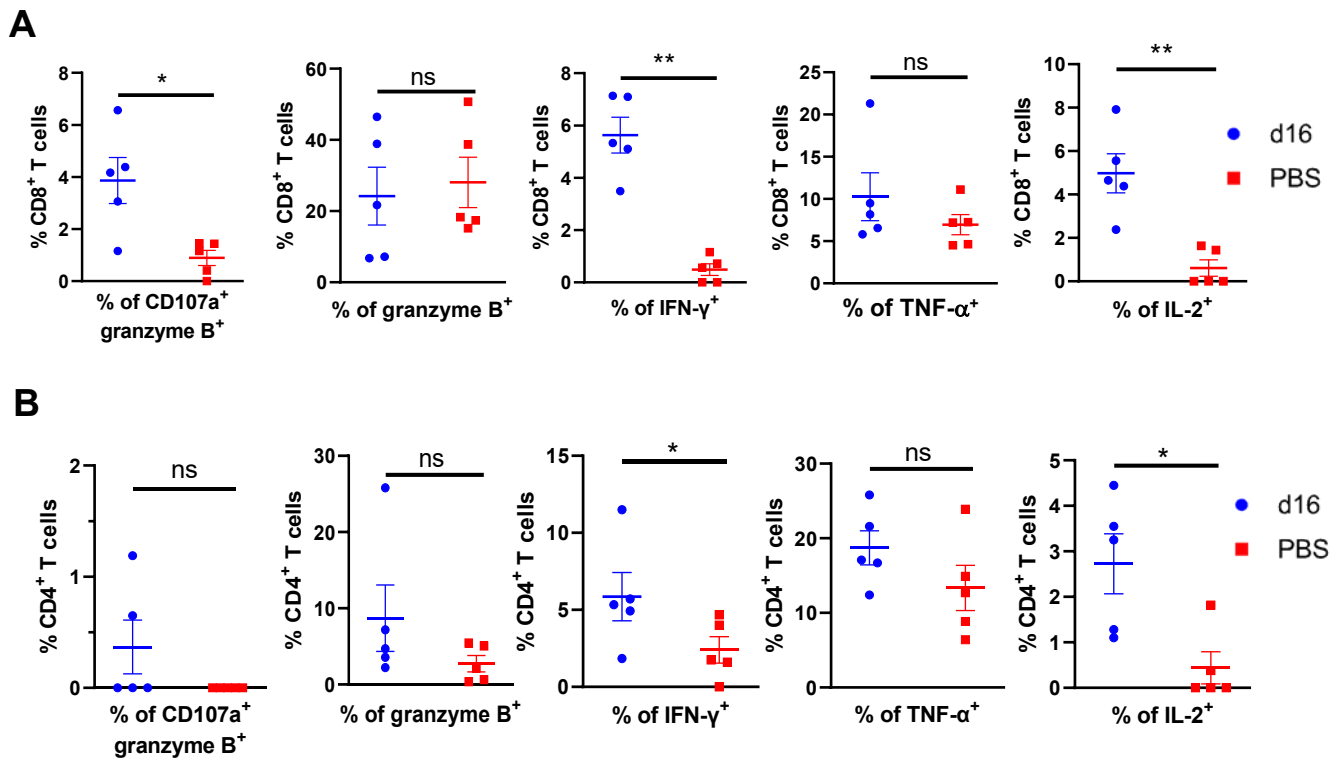

**Fig. S5. Related to Fig. 4; T cell immunity elicited by vaccination of K18-hACE2 transgenic mice with d16.** K18-hACE2 mice were intranasally vaccinated with 1000 PFU of d16 or PBS ( $n = 5$  mice/group) and challenged with 10000 PFU of clinical isolate HK-13 of SARS-CoV-2 at day 29. Lung-origin T cells were subjected to flow cytometric analysis 4 days post infection. Lung-origin lymphocytes were stimulated with 1  $\mu\text{g/ml}$  of peptide pool of SARS-CoV-2 N protein for 4 h in the presence of brefeldin. Percentages of CD107a<sup>+</sup> and cytokine producing CD8<sup>+</sup> (A) and CD4<sup>+</sup> (B) T cells were also assessed. Results are shown as mean  $\pm$  SEM. Statistical analyses via Student's t test (\*:  $P < 0.05$ ; \*\*:  $P < 0.01$ ; ns: not significant).

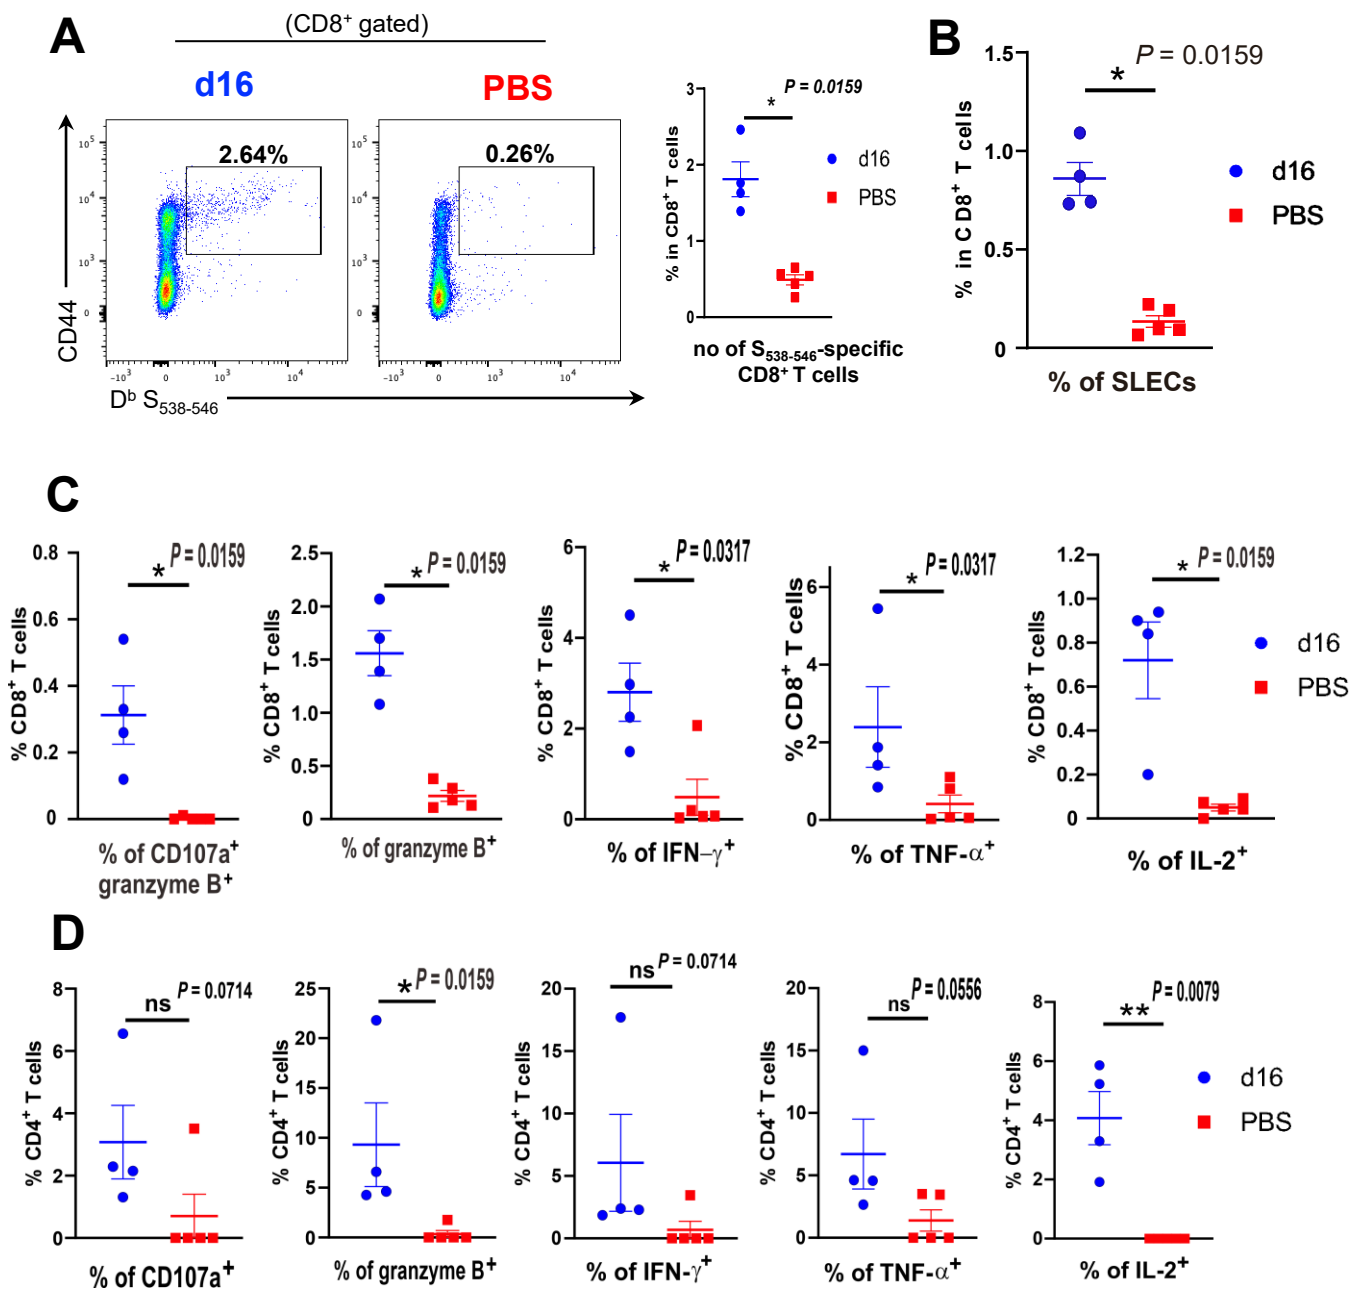

**Fig. S6. SARS-CoV-2 d16 elicits robust T cell response in spleen following challenge with HK-13 virus.** K18-hACE2 mice were intranasally inoculated with 1000 PFU of SARS-CoV-2 d16 or PBS (n = 4 or 5 mice/group) and challenged with 10000 PFU of SARS-CoV-2 HK-13 strain at day 29 dpi. T cells from spleen were subjected to flow cytometric analysis 4 days later. **A** Representative flow cytometric plots showing percentages of S<sub>538-546</sub>-specific CD8<sup>+</sup> T cells. **B** Proportions of short-lived effectors (KLRG1<sup>+</sup>IL-7R<sup>-</sup>) among total CD8<sup>+</sup> T cells. Splenocytes were stimulated with 1 μg/ml of S<sub>538-546</sub> peptide for 4 h in the presence of brefeldin A. Percentages of cytokine-producing CD8<sup>+</sup> (**C**) and CD4<sup>+</sup> (**D**) T cells. Results are shown as mean ± SEM. Difference between the indicated groups was statistically significant as judged by Student's t test (\*:  $P < 0.05$ ; \*\*:  $P < 0.01$ ; ns: not significant).

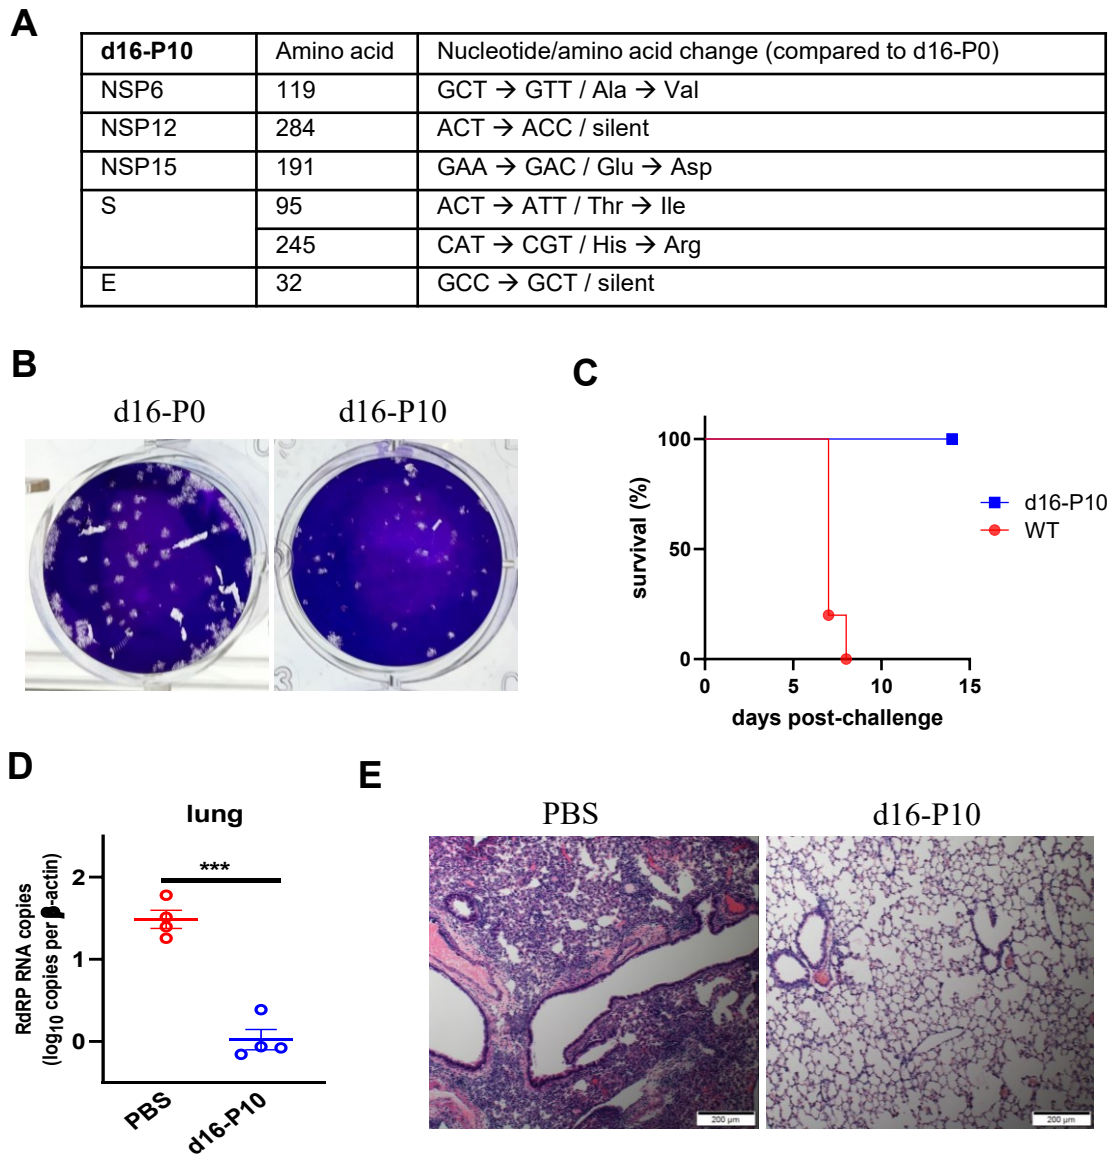

**Fig. S7. Further characterization of passage 10 of d16 virus (d16-P10).** **A** A summary of the point mutations found in d16-P10 after passaging in Vero cells by nanopore sequencing [14]. **B** Plaque phenotype. VeroE6-TMPRSS2 cells were infected with the indicated recombinant viruses. After 60 h of incubation at 37°C, cells were fixed and stained with 1% crystal violet. **C** The survival rates of WT- or d16-P10-infected K18-hACE2 transgenic mice (n = 5/group). K18-hACE2 mice were intranasally inoculated with 1000 PFU of recombinant WT or d16-P10 and the survival rate were observed for 14 days. **D** Viral loads by RT-qPCR of lung tissues of SARS-CoV-2-infected mice vaccinated with d16-P10 or PBS at 4 dpi (n = 4/group). Statistical analyses via Student's t test (\*\*\*:  $P < 0.001$ ). After intranasal vaccination with 1000 PFU of recombinant d16 or PBS, each vaccinated mouse was challenged with 10000 PFU of clinical isolate HK-13 of SARS-CoV-2 at day 29. At day 33, lung tissues were collected for quantification of viral loads using RT-qPCR. **E** Effect of vaccination on the histopathological changes in lungs of SARS-CoV-2-infected vaccinated mice. Representative sections of lung tissue from mice harvested at 4 dpi were stained with H&E.



**Table S1. Primers used in this study.**

| <b>Mutants constructed</b>                                                                     | <b>Sequences (5' – 3')</b>                                                                                                          |
|------------------------------------------------------------------------------------------------|-------------------------------------------------------------------------------------------------------------------------------------|
| NSP16 galK forward                                                                             | TTGGTGATTGTGCAACTGTACATACAGCTAATAAATGG<br>GATCTCATTATT <u>CCTGTTGACAATTAATCATCGGCA</u>                                              |
| NSP16 galK reverse                                                                             | CCCTCTTTAGAGTCATTTTCTTTTGTAACATTTTGTAGTC<br>TTAGGGTCGTA <u>TCAGCACTGTCCTGCTCCTT</u>                                                 |
| NSP16 D130A forward                                                                            | TTGGTGATTGTGCAACTGTACATACAGCTAATAAATGG<br>GATCTCATTATTAGTg <sub>c</sub> TATGTACGACCCTAAGACTAA<br>AAATGTTACAAAAAGAAAATGACTCTAAAGAGGG |
| NSP16 D130A reverse                                                                            | CCCTCTTTAGAGTCATTTTCTTTTGTAACATTTTGTAGTC<br>TTAGGGTCGTACATAg <sub>c</sub> CACTAATAATGAGATCCCATT<br>ATTAGCTGTATGTACAGTTGCACAATCACCAA |
| *The galK-complementary sequences are underlined.<br>**Point mutations are shown in lowercase. |                                                                                                                                     |
| <b>Sanger sequencing</b>                                                                       |                                                                                                                                     |
| NSP16 forward                                                                                  | CTACGGGTACGCTGCTTGTC                                                                                                                |
| NSP16 reverse                                                                                  | ATGCGAAGTGTCCCATGAGC                                                                                                                |
| <b>qPCR</b>                                                                                    |                                                                                                                                     |
| <b>SARS-CoV-2</b>                                                                              |                                                                                                                                     |
| RdRp forward                                                                                   | CGCATACAGTCTTRCAGGCT                                                                                                                |
| RdRp reverse                                                                                   | GTGTGATGTTGAWATGACATGGTC                                                                                                            |
| <b>mice</b>                                                                                    |                                                                                                                                     |
| IL-1 $\beta$ forward                                                                           | GAAATGCCACCTTTTGACAGTG                                                                                                              |
| IL-1 $\beta$ reverse                                                                           | TGGATGCTCTCATCAGGACAG                                                                                                               |
| IL-6 forward                                                                                   | CTGCAAGAGACTTCCATCCAG                                                                                                               |
| IL-6 reverse                                                                                   | AGTGGTATAGACAGGTCTGTTGG                                                                                                             |
| IFN- $\gamma$ forward                                                                          | CAGCAACAGCAAGGCGAAAAAGG                                                                                                             |
| IFN- $\gamma$ reverse                                                                          | TTCCGCTTCCCTGAGGCTGGAT                                                                                                              |
| $\beta$ -actin forward                                                                         | AAGGCCAACCGTGAAAAGAT                                                                                                                |
| $\beta$ -actin reverse                                                                         | GTGGTACGACCAGAGGCATAC                                                                                                               |
| <b>hamster</b>                                                                                 |                                                                                                                                     |
| IL-4 forward                                                                                   | ACAGAAAAAGGGACACCATGCA                                                                                                              |
| IL-4 reverse                                                                                   | GAAGCCCTGCAGATGAGGTCT                                                                                                               |
| IL-6 forward                                                                                   | AGACAAAGCCAGAGTCATT                                                                                                                 |
| IL-6 reverse                                                                                   | TCGGTATGCTAAGGCACAG                                                                                                                 |
| IL-10 forward                                                                                  | GGTTGCCAAACCTTATCAGAAATG                                                                                                            |
| IL-10 reverse                                                                                  | TTCACCTGTTCCACAGCCTTG                                                                                                               |
| TNF- $\alpha$ forward                                                                          | TGAGCCATCGTGCCAATG                                                                                                                  |
| TNF- $\alpha$ reverse                                                                          | AGCCCGTCTGCTGGTATCAC                                                                                                                |
| CCL17 forward                                                                                  | GTGCTGCCTGGAGATCTTCA                                                                                                                |
| CCL17 reverse                                                                                  | TGGCATCCCTGGGACACT                                                                                                                  |
| FOXP3 forward                                                                                  | GGTCTTCGAGGAGCCAGAAGA                                                                                                               |
| FOXP3 reverse                                                                                  | GCCTTGCCCTTCTCATCCA                                                                                                                 |
| GAPDH forward                                                                                  | GACATCAAGAAGGTGGTGAAGCA                                                                                                             |
| GAPDH reverse                                                                                  | CATCAAAGGTGGAAGAGTGGGA                                                                                                              |
| $\beta$ -actin forward                                                                         | ACTGCCGCATCCTCTTCT                                                                                                                  |
| $\beta$ -actin reverse                                                                         | TCGTTGCCAATGGTGATGAC                                                                                                                |
